# Supplementary material for: Unraveling the gut microbiome of the long-lived naked mole-rat
Source: PubMed Central journal article supplement (PMC5575099; doi:10.1038/s41598-017-10287-0), 2017-08-29

## **Unraveling the gut microbiome of the long-lived naked mole-rat**

Tewodros Debebe, Elena Biagi, Matteo Soverini, Susanne Holtze, Thomas Bernd Hildebrandt, Claudia Birkemeyer, Dereje Wyohannis, Alemayehu Lemma, Patrizia Brigidi, Vulk Savkovic, Brigitte König, Marco Candela, Gerd Birkenmeier

## **Supplementary files**

**Supplementary Figure 1** – Phylum level individual profiles (barplot) and average profile (pie chart) of naked mole-rat microbiota.

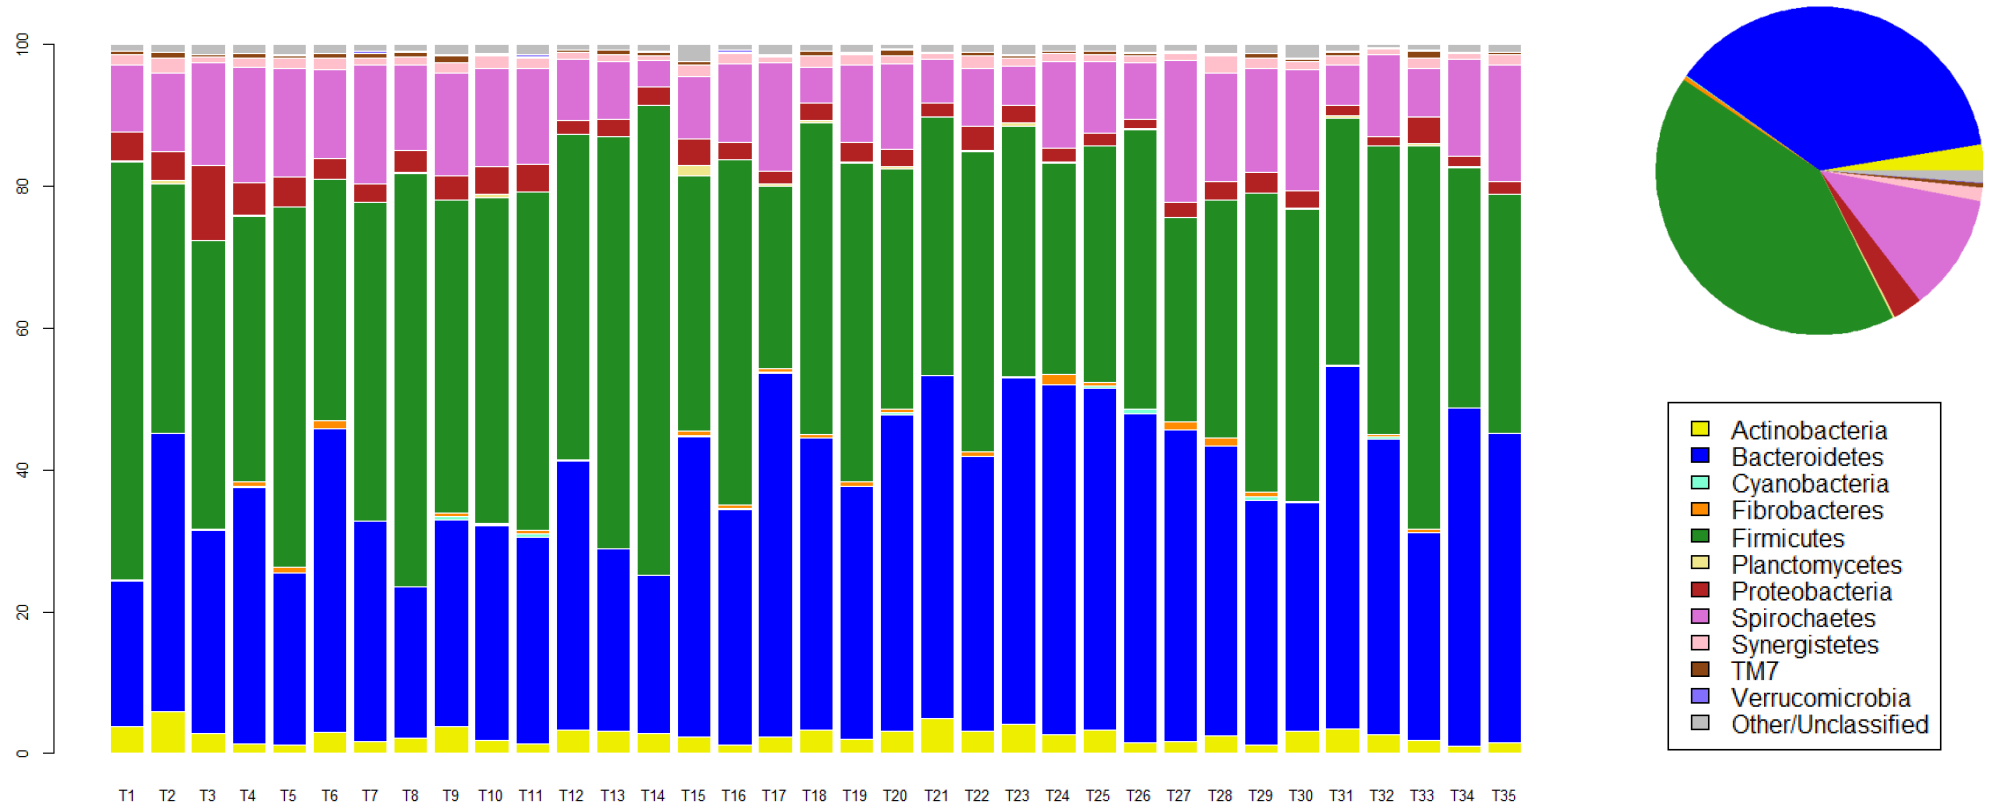

**Supplementary Figure 2** – Family level individual profiles (barplot) and average profile (pie chart) of naked mole-rat microbiota.

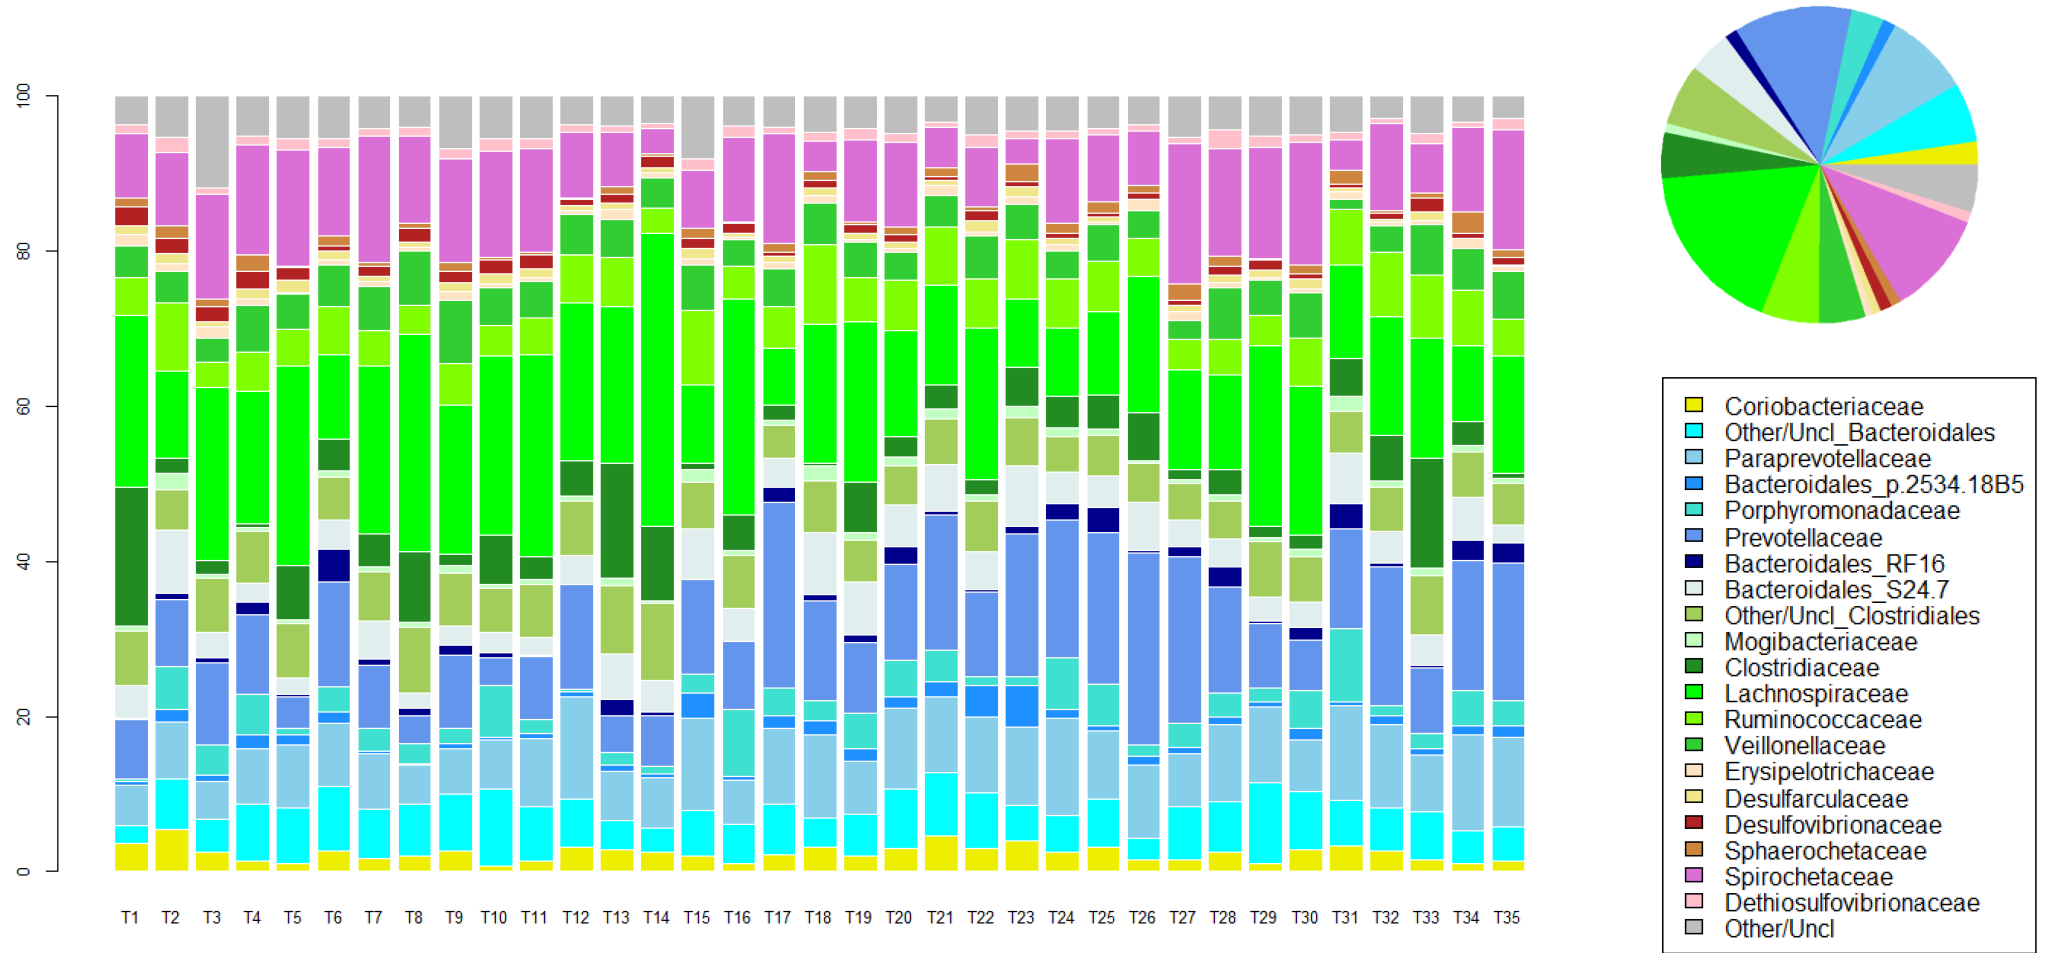

**Supplementary Figure 3** – Genus level individual profiles (barplot) and average profile (pie chart) of naked mole-rat microbiota.

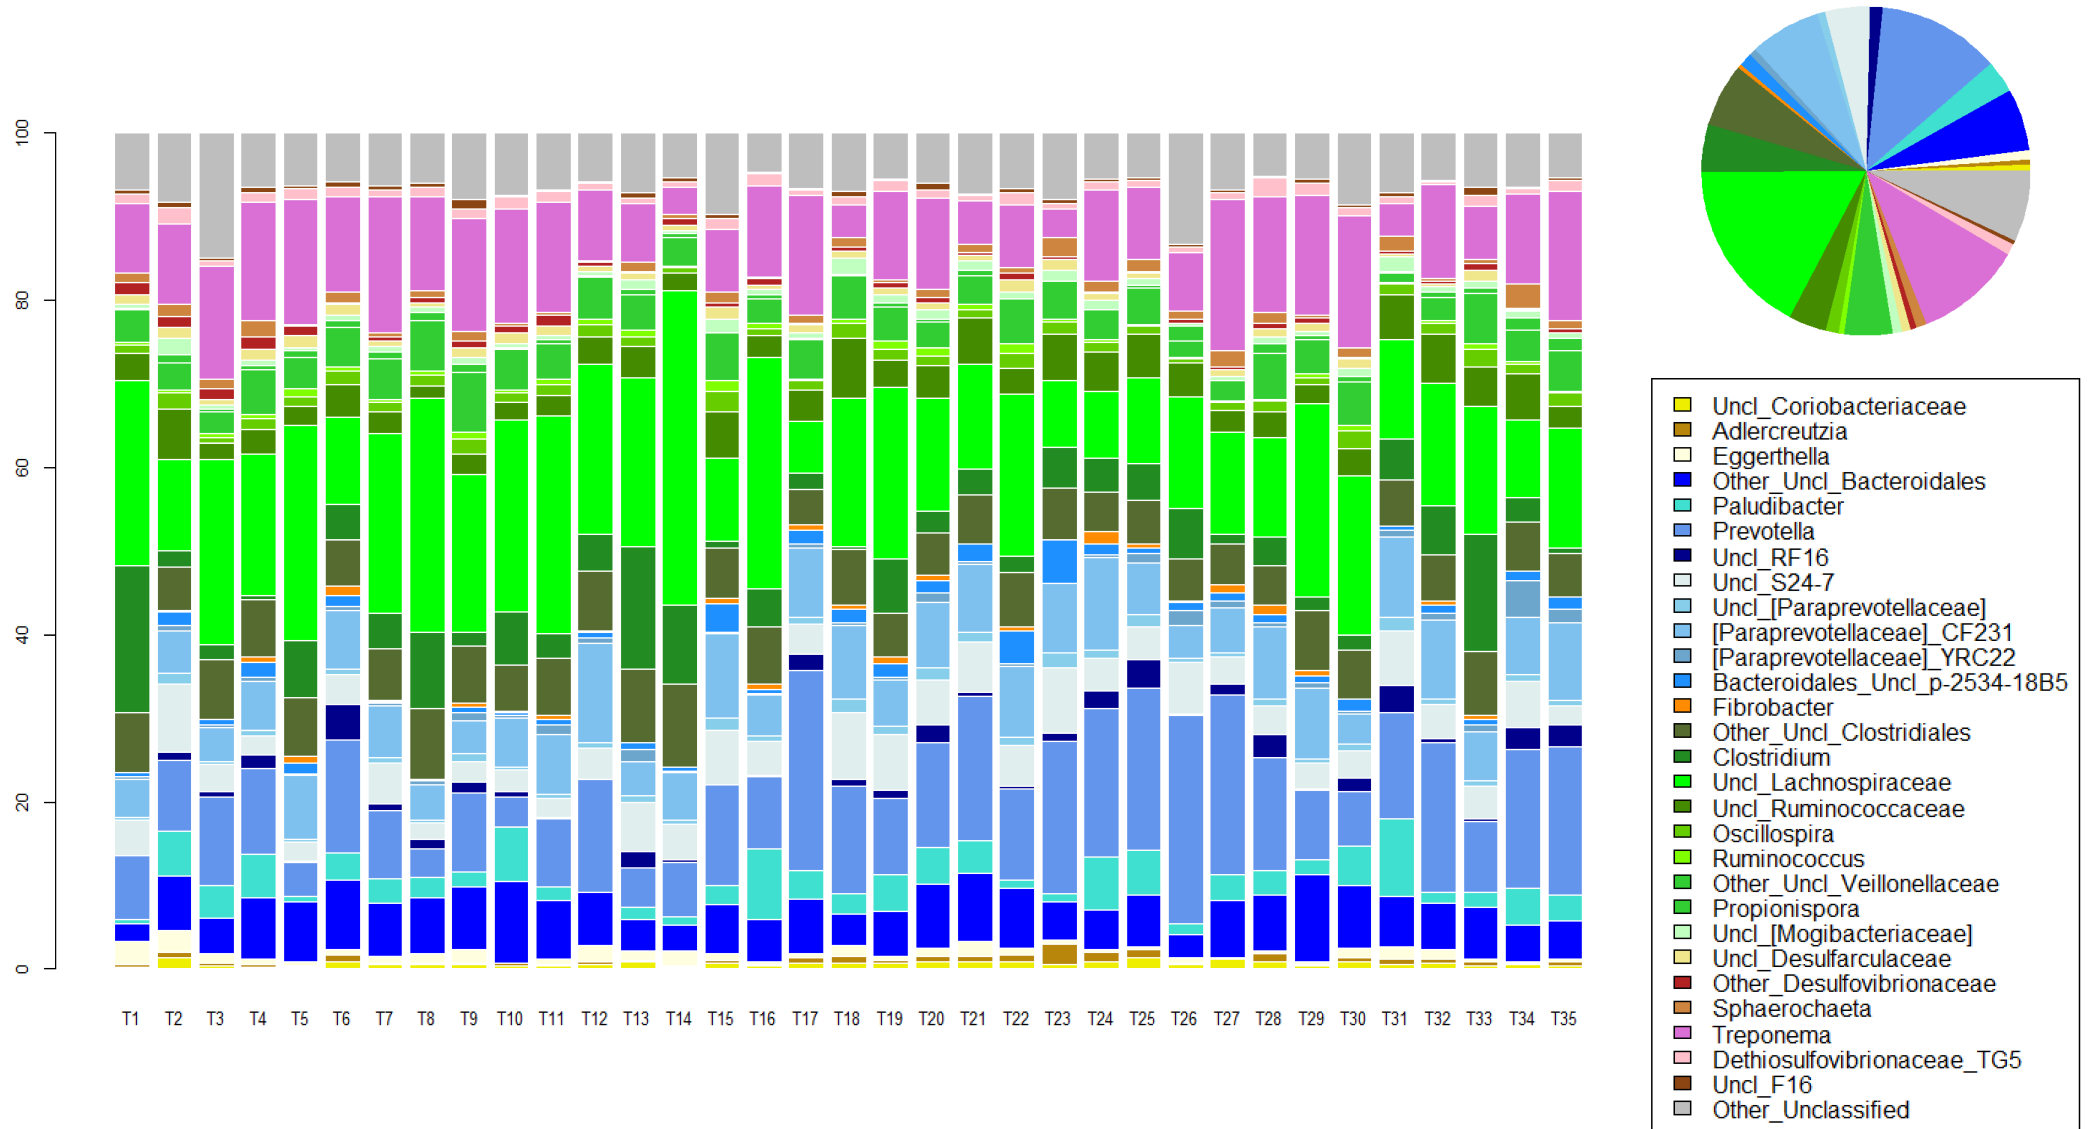

Supplement: 41598_2017_10287_MOESM1_ESM.pdf [file 41598_2017_10287_MOESM1_ESM.pdf]
